# Supplementary material for: A comparative study of the characterization of miR-155 in knockout mice
Source: PubMed Central journal article supplement (PMC5344489; doi:10.1371/journal.pone.0173487), 2017-03-09
Supplement: pone.0173487.s005.pdf [file pone.0173487.s005.pdf]

**S1Table. List of abbreviations**

|          |                                            |
|----------|--------------------------------------------|
| A/G      | albumin/ globulin                          |
| ALB      | Albumin                                    |
| ALT      | Alanine aminotransferase                   |
| AST      | Aspartic transaminase                      |
| BAS      | Basophils                                  |
| BUN      | Blood urea nitrogen                        |
| CO       | Cardiac output                             |
| CRE      | Creatinine                                 |
| EOS      | Eosinophils                                |
| GLB      | globulin                                   |
| GLU      | Blood glucose                              |
| HCT      | Hematocrit                                 |
| HGB      | Hemoglobin                                 |
| IVS      | Interventricular septum                    |
| LA       | Left atrium                                |
| LV       | Left ventricle                             |
| LVAW(D)  | Left ventricular anterior wall (Diastole)  |
| LVAW(S)  | Left ventricular anterior wall (Shrink)    |
| LVEDD    | Left ventricular end-diastolic diameter    |
| LVEDV    | left ventricular end-diastolic volume      |
| LVEF     | Left ventricular ejection fraction         |
| LVESD    | Left ventricular end-systolic diameter     |
| LVESV    | Left ventricular end-systolic volume       |
| LVFS     | Left ventricular fractional shortening     |
| LVM      | LV mass                                    |
| LVOT     | Left ventricular outflow tract             |
| LVPW(D)  | Left ventricular posterior wall (Diastole) |
| LVPW(S)  | Left ventricular posterior wall (Shrink)   |
| LVSV     | Left ventricular stroke volume             |
| LYM      | Lymphocytes                                |
| MCH      | Mean corpuscular hemoglobin                |
| MCHC     | Mean corpuscular hemoglobin concentration  |
| MCV      | Mean corpuscular volume                    |
| Mean Vel | Mean velocity                              |
| MON      | Monocytes                                  |

|          |                                     |
|----------|-------------------------------------|
| MPV      | Mean platelet volume                |
| NEUT     | Neutrophils                         |
| PCT      | Thrombocytocrit                     |
| PDW      | Platelet distribution width         |
| Peak Vel | Peak velocity                       |
| PLT      | Platelets                           |
| PV       | Portal vein                         |
| PV Diam  | Portal vein diameter                |
| RA       | Renal artery                        |
| RA Diam  | Renal artery diameter               |
| RAEDV    | Renal artery end diastolic velocity |
| RAPSV    | Renal artery peak systolic velocity |
| RARI     | Renal artery resistance index       |
| RBC      | Red blood cells                     |
| RDW      | Red cell distribution width         |
| TP       | Total protein                       |
| VTI      | Velocity time integral              |
| WBC      | White blood cells                   |
